# Supplementary material for: Stable functionalized graphene oxide–cellulose nanofiber solid electrolytes with long-range 1D/2D ionic nanochannels
Source: Royal Society of Chemistry journal article supplement (doi:10.1039/c9ta07883e), 2019-01-01
Supplement: c9ta07883e1.pdf [file c9ta07883e1.pdf]

*Electronic Supporting Information (ESI)*

Stable Functionalized Graphene Oxide – Cellulose  
Nanofiber Solid Electrolytes with Long-range 1D/2D  
Ionic Nanochannels

Wei Jia and Peiyi Wu\*

State Key Laboratory of Molecular Engineering of Polymers, Collaborative  
Innovation Center of Polymers and Polymer Composite Materials, Department of  
Macromolecular Science, Laboratory of Advanced Materials, Fudan University,  
Shanghai, 200433, P. R. China. E-mail: peiyiwu@fudan.edu.cn;

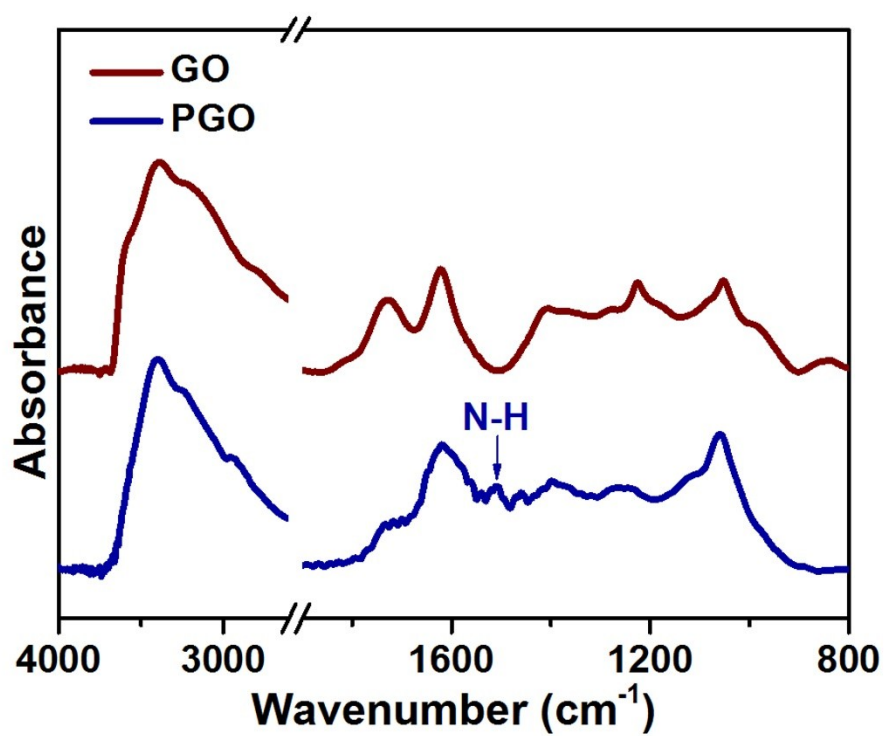

Fig. S1 FTIR spectra of GO and PGO.

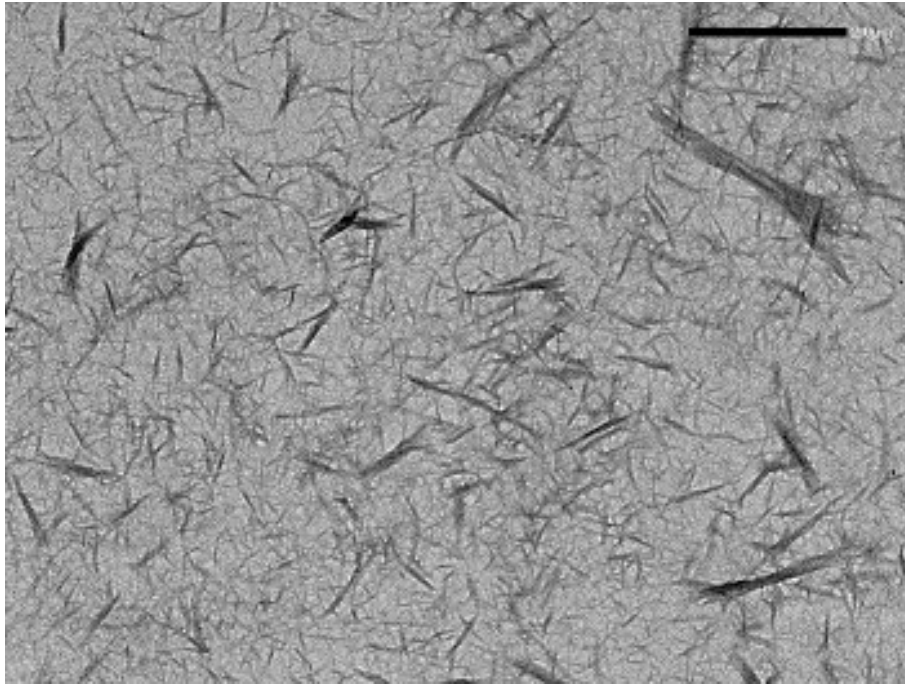

**Fig. S2** The TEM image of CNF. The length of the scale bar is 2  $\mu\text{m}$ .

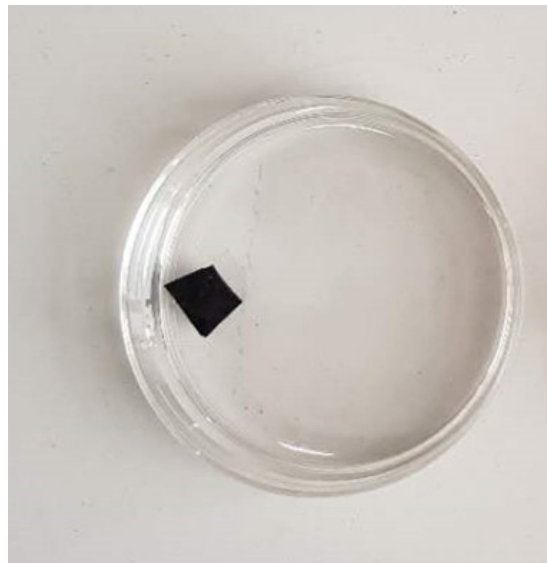

**Fig. S3** The digital photo of NPGOM-10-CNF after immersing in water for two weeks.

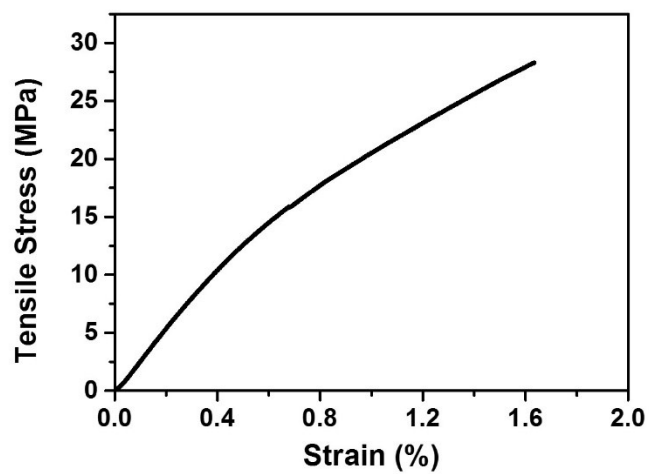

**Fig. S4** The stress-strain curve of NPGOM-10-CNF.

**Table S1** Comparison of transport properties of NPGOM-10-CNF with the previously reported membranes.

| PEMs                          | Proton                                |                                 | Methanol                                            |                                                       | Reference |
|-------------------------------|---------------------------------------|---------------------------------|-----------------------------------------------------|-------------------------------------------------------|-----------|
|                               | Conductivity<br>(S·cm <sup>-1</sup> ) | Conditions                      | Permeability<br>(cm <sup>2</sup> ·s <sup>-1</sup> ) | Condition                                             |           |
| NPGOM-10-CNF                  | 0.13                                  | 100 °C-40% RH                   | 8.8E-09                                             | 40 °C (80 v/v%<br>methanol/H <sub>2</sub> O solution) | This work |
| srNPGOM                       | 0.04                                  | 100 °C-40% RH                   | 2.0E-09                                             | 40 °C (80 v/v%<br>methanol/H <sub>2</sub> O solution) | 1         |
| GO/MMT/SPVA                   | 0.02                                  | 80 °C-40% RH                    | -                                                   | -                                                     | 2         |
| P-GOM                         | 0.032                                 | 80 °C-51% RH                    | 4.3E-07                                             | 30 °C                                                 | 3         |
| Ozonated GO film              | 3E-04                                 | 30 °C-40% RH                    | -                                                   | -                                                     | 4         |
| Nafion212-<br>PDDA-GO         | -                                     | -                               | 63% decrease                                        | 2M methanol solution                                  | 5         |
| SGO-surface<br>coating Nafion | 0.18                                  | 80 °C in water                  | 1.3E-07                                             | 30 °C                                                 | 6         |
| PDA@Nafion117                 | 0.07                                  | Room<br>temperature<br>in water | 6.5E-07                                             | (2M methanol solution)                                | 7         |
| CNFM                          | 1E-04                                 | 30 °C-40% RH                    | -                                                   | -                                                     | 8         |
| Electrospun BSA<br>membrane   | 3E-04                                 | 35 °C in water                  | -                                                   | -                                                     | 9         |

### References:

1. W. Jia, B. Tang and P. Wu, *ACS Appl. Mater. Interfaces*, 2017, **9**, 22620–22627.
2. G. He, M. Xu, J. Zhao, S. Jiang, S. Wang, Z. Li, X. He, T. Huang, M. Cao and H. Wu, *Adv. Mater.*, 2017, **29**, 1605898.
3. G. He, C. Chang, M. Xu, S. Hu, L. Li, J. Zhao, Z. Li, Z. Li, Y. Yin and M. Gang, *Adv. Funct. Mater.*, 2015, **25**, 7502-7511.
4. W. Gao, G. Wu, M. T. Janicke, D. A. Cullen, R. Mukundan, J. K. Baldwin, E. L. Brosha, C. Galande, P. M. Ajayan and K. L. More, *Angew. Chem., Int. Ed.*, 2014, **53**, 3588-3593.
5. T. Yuan, L. Pu, Q. Huang, H. Zhang, X. Li and H. Yang, *Electrochim. Acta*, 2014, **117**, 393-397.
6. G. He, X. He, X. Wang, C. Chang, J. Zhao, Z. Li, H. Wu and Z. Jiang, *Chem. Commun.*, 2016, **52**, 2173-2176.
7. J. Wang, L. Xiao, Y. Zhao, H. Wu, Z. Jiang and W. Hou, *J. Power Sources*, 2009, **192**, 336-343.
8. T. Bayer, B. V. Cuning, R. Selyanchyn, M. Nishihara, S. Fujikawa, K. Sasaki and S. M. Lyth, *Chem. Mater.*, 2016, **28**, 4805-4814.
9. N. Amdursky, X. Wang, P. Meredith, D. D. Bradley and M. M. Stevens, *Adv. Mater.*, 2016, **28**, 2692-2698.
